# Supplementary material for: Development, evaluation and implementation of a digital behavioural health treatment for chronic pain: study protocol of the multiphase DAHLIA project
Source: HighWire-hosted journal article supplement (doi:10.1136/bmjopen-2021-059152), 2022-04-01
Supplement: bmjopen-2021-059152supp002_data_supplement.pdf [file bmjopen-2021-059152supp002_data_supplement.pdf]

## Appendix 2. Baseline interviews with stakeholders

Various stakeholders will be approached, including developers, health care professionals, and managers. Through snow-ball sampling, other potential stakeholders will be identified and approached (e.g., individuals from policy making or municipality representatives).

### ***Stakeholder: developers***

#### I. General

Theme: Experience and development of digital interventions within the 1177 web-platform

1. What is your job description and what are your responsibilities?
2. How is the 1177 web-platform structured, in the region of Kalmar and Sweden?
3. How many digital interventions are available within 1177 in your region?
4. Who developed these interventions; who integrated them in the platform?
5. How are these interventions financed?
6. Who is responsible/ involved in the maintenance of the interventions?
7. If/ how is the interventions' content updated?
8. If/ how are the interventions used and promoted in health care?
9. If/how is user satisfaction with interventions evaluated?
10. If/how do collaborations with other regions look like?

#### II. Specifics (focus about DAHLIA project)

1. How would you describe the anticipated implementation process of this intervention?
2. What is needed to support the implementation process?
3. What could facilitate the implementation process?
4. What could hinder the implementation process?
5. What are benefits for you/ the 1177 web-platform when developing this intervention?
6. Are you enthusiastic about this intervention, if so, why?
7. Do you think this intervention has the potential to be successful in your region, and Sweden?
8. Where would you like to see this intervention in 5 years?

### ***Stakeholder: health care professionals***

#### I. General

Theme: Experience and use of digital interventions with patients

1. What is your job description and what are your responsibilities?
2. What is your experience in delivering interventions via the 1177 web-platform?
3. If/when there is a new intervention available in the 1177 web-platform, how do you usually hear about it?
4. What makes it attractive to deliver such an intervention?
5. What resources are needed for you to deliver these interventions (e.g., time, knowledge, managerial support)?
6. What hinders you to deliver these interventions?

#### II. Specifics (short introduction of DAHLIA project and details of digital behavioral health treatment for people with chronic pain)

1. Do you think there is a need for this intervention? Please elaborate.
2. What benefits for yourself/your work do you anticipate through this intervention?
3. What benefits for your patients do you anticipate?
4. What disadvantages or problems do you anticipate when delivering this intervention?

5. What disadvantages or problems for your patients when receiving the intervention do you anticipate?
6. What would hinder you to deliver this intervention?
7. What would facilitate you to deliver this intervention?
8. Are you enthusiastic about this intervention, if so, why?
9. Do you think this intervention has the potential to be successful in your care facility?
10. Where would you like to see this intervention in 5 years?

**Stakeholder: health care managers**

Theme: Experience and promotion of digital interventions in care facility

1. What is your job description and what are your responsibilities?
2. How many digital interventions are currently offered by the 1177 web-platform (and used) in your care facility?
3. What is needed to implement an intervention from the 1177 web-platform in your care facility?
4. How do digital interventions get financed in your care facility?
5. What is your involvement in digital interventions in your care facility? How do you support the use of digital interventions?
6. What hinders the implementation of these interventions, in your eyes?
7. If/ how does your care facility collaborate with other regions regarding digital interventions from the 1177 web-platform?

II. Specifics (short introduction of DAHLIA project and details of digital behavioral health treatment for people with chronic pain)

1. Do you think there is a need for this intervention? Please elaborate.
2. What kind of benefits do you anticipate for employees through this intervention?
3. What kind of benefits do you anticipate for patients through this intervention?
4. What kind of disadvantages or problems for employees do you anticipate through this intervention?
5. What kind of disadvantages or problems for patients do you anticipate through this intervention?
6. Are you enthusiastic about this intervention, and if so, why?
7. How will you promote this intervention in your care facility?
8. Do you think this intervention has the potential to be successful in your care facility?
9. Where would you like to see this intervention in 5 years?

*Final question for all participants:*

The main points I take away from this interview are [summary]. I appreciate the time you took for this interview. Who else should we talk about regarding the implementation of this intervention? Is there anything else you think would be helpful for me to know?
