# Supplementary material for: Development, evaluation and implementation of a digital behavioural health treatment for chronic pain: study protocol of the multiphase DAHLIA project
Source: HighWire-hosted journal article supplement (doi:10.1136/bmjopen-2021-059152), 2022-04-01
Supplement: bmjopen-2021-059152supp004_data_supplement.pdf [file bmjopen-2021-059152supp004_data_supplement.pdf]

## **Appendix 4: Follow-up interviews with stakeholders**

The stakeholders from the baseline assessment will be approached again. Furthermore, through snow-ball sampling, potential new stakeholders will be identified and also approached.

### ***Stakeholder: developers***

Process so far:

1. When reflecting on the overall development, evaluation, and implementation process, what went well?
2. When reflecting on the overall development, evaluation, and implementation process, what did not go well?
3. What factors supported the process of bringing this intervention into practice?
4. What factors hindered the process of bringing this intervention into practice?
5. What kind and how much resources were needed?
6. Did the process go as anticipated? If not, what was surprising?
7. How satisfied are you with the process so far?
8. What was most challenging during the implementation process?

Current use:

1. What are you currently doing to keep the intervention implemented?
2. Do you have sufficient resources? Please elaborate.
3. What issues are you currently facing? What solutions for these issues do you have?

Prospective adjustments:

1. What will the prospective maintenance and upkeep look like?
2. Who is responsible for that?
3. If there should be a change in employment, who ensures that the intervention remains updated?

### ***Stakeholder: health care professionals***

Process so far:

1. How often did you deliver the digital intervention?
2. What kind of benefits for yourself, your work, and/or your patients did you experience?
3. What kind of disadvantages for yourself, your work, and/or your patients did you experience?
4. What kind of support for delivering the intervention (e.g., training, technical guidance when issues arose) did you receive?
5. What hindered you in delivering the intervention?
6. What facilitated you to deliver the intervention?

Current use:

1. How satisfied are you with the intervention overall?
2. Which elements of the intervention need improvement?

Prospective adjustments:

1. Do you plan on delivering the intervention in the future? If not, please elaborate.
2. Would you recommend the intervention to a colleague?
3. What kind of problems do you anticipate in the future; and do you have potential solutions for them?

### ***Stakeholder: health care managers***

Process so far:

1. How would you describe your involvement in implementing the intervention?
2. How many resources were needed for the implementation?
3. Did the implementation process go as expected? If not, what was surprising?
4. How did you support your employees to deliver the intervention?

Current use:

1. How satisfied are you currently with the intervention (e.g., reflecting on use, content, promotion, required resources, (technical) issues)?
2. What aspects of the current implementation/ practical use need improvements?

Prospective adjustments:

1. Do you plan to offer the intervention in your region in the future? Please elaborate.
2. Would you recommend this intervention to another region/ other health care organizations? Please elaborate.
3. What kind of problems do you anticipate in the future?

*Final question for all participants:*

The main points I take away from this interview are [summary]. I appreciate the time you took for this interview. Who else should we talk about regarding the implementation of this intervention? Is there anything else you think would be helpful for me to know?
